# Supplementary material for: A pathway for low zinc homeostasis that is conserved in animals and acts in parallel to the pathway for high zinc homeostasis
Source: PubMed Central journal article supplement — Nucleic Acids Res. 2017 Aug 30;45(20):11658–72. doi: 10.1093/nar/gkx762 (PMC5714235; doi:10.1093/nar/gkx762), 2017-08-30
Supplement: gkx762_supp.pdf [file gkx762_supp.pdf]

## SUPPLEMENTAL TABLES AND FIGURES

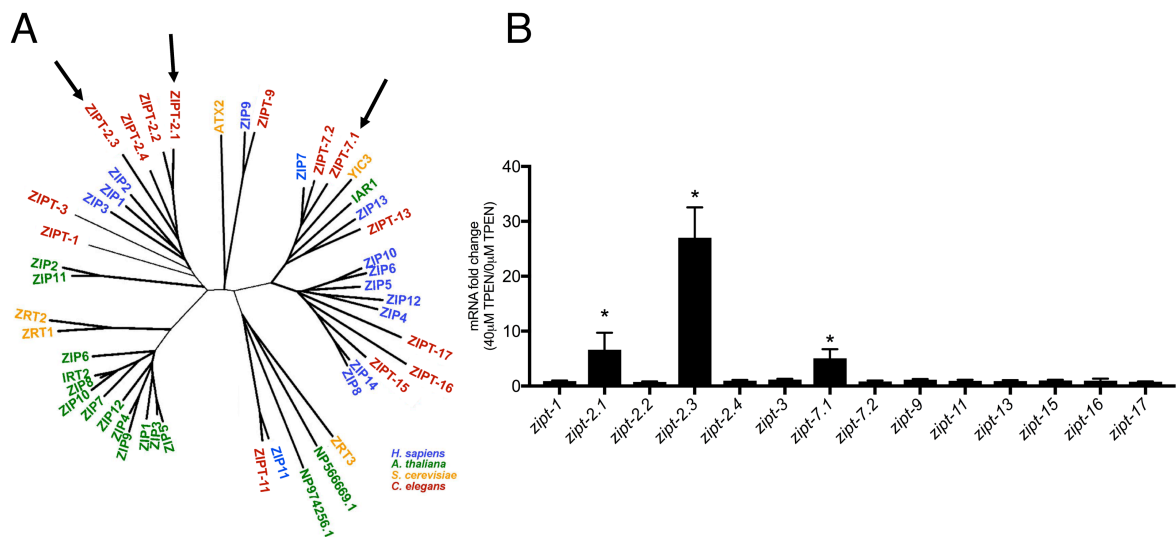

**Supplemental Figure 1.** Phylogenetic tree of ZIP family members, and transcriptional regulation of *C. elegans* *zip* genes by zinc deficient conditions. (A) A dendrogram showing 14 predicted *C. elegans* ZIP family members (red) identified by PSI-BLAST and all predicted ZIP proteins from the mammal *Homo sapiens* (blue), the plant *Arabidopsis thaliana* (green), and the yeast *Saccharomyces cerevisiae* (yellow). ZIPT-2.1, ZIPT-2.3 and ZIPT-7.1 are indicated by arrows. Notably, all fourteen human ZIP proteins cluster with highly related *C. elegans* proteins. For genes that encode multiple protein isoforms, only one isoform is listed. (B) A population of mixed-stage, wild-type animals were cultured with 0 or 40  $\mu$ M TPEN for 16 hours. RNA levels of all 14 *zip* genes were analyzed by qRT-PCR. Values are the ratio of mRNA levels at 40  $\mu$ M TPEN/ 0  $\mu$ M TPEN, an indication of transcriptional activation, and are the average of 3 biological replicates; error bars display standard deviation. The *zip-2.1*, *zip-2.3* and *zip-7.1* genes displayed significantly increased mRNA levels at 40  $\mu$ M TPEN (\*  $P < 0.05$ ).

| Species            | Gene           | Upstream                                       | Downstream                            |
|--------------------|----------------|------------------------------------------------|---------------------------------------|
| <i>C. elegans</i>  | <i>zip-2.1</i> | GAAC <b>TTTC</b> GATGATCTGAAA                  | CAA <b>AATTT</b> GAGCCGGTTACC         |
| <i>C. brenneri</i> | <i>zip-2.1</i> | GATCTGTAAGAGTGAAAAGA                           | CAATGGTTTTTTT <b>CAGTTTT</b> C        |
| <i>C. briggsae</i> | <i>zip-2.1</i> | TATGATGATCTGAAAAGTAT                           | CCTTTT <b>GCCGAGCC</b> CCTCC          |
| <i>C. japonica</i> | <i>zip-2.1</i> | GTGGTTAGCTCCGAAACAAA                           | ATGAAAAAGAGTGTAGAGAG                  |
| <i>C. elegans</i>  | <i>zip-2.3</i> | T <b>TAAACAC</b> CGAAACACGACA                  | CAGG <b>CAAAA</b> ACCTATAAAAC         |
| <i>C. brenneri</i> | <i>zip-2.3</i> | AAAATAACTCGAAG <b>AATT</b> CA                  | CAGTCATTTGGTCGGTTGGT                  |
| <i>C. briggsae</i> | <i>zip-2.3</i> | TCGAAA <b>AA</b> CCCTGCTTATTG                  | CAGTCGTTTGGTCAACCTAT                  |
| <i>C. japonica</i> | <i>zip-2.3</i> | TCCATA <b>AA</b> CTCATAAAGCTA                  | CCGTCGCGGTCAAACCTATA                  |
| <i>C. elegans</i>  | <i>zip-7.1</i> | GGTGT <b>TATA</b> ACACGTCAGCG                  | TTGCGGTTTTT <b>CCTT</b> GGAGA         |
| <i>C. brenneri</i> | <i>zip-7.1</i> | GAGGCGCTATTACACG <b>TC</b> CA                  | TGGCGAGAAAGAACAAATAG                  |
| <i>C. briggsae</i> | <i>zip-7.1</i> | GGTGT <b>TATA</b> ACACGTCAGT                   | TGGCGCAGAGGAGAGAA <b>CAA</b>          |
| <i>C. japonica</i> | <i>zip-7.1</i> | ACACG <b>TC</b> ATCCA <b>ACT</b> CTTT <b>C</b> | TTGGCGTGAACAAAC <b>AC</b> C <b>TT</b> |

**Supplemental Figure 2.** Sequences flanking LZA elements did not display evolutionary conservation. Based on the LZA elements identified by MEME (Figure 1D), we aligned the sequences twenty base pairs upstream and twenty base pairs downstream of LZA elements in the promoter regions of *zipt-2.1*, *zipt-2.3*, and *zipt-7.1* in the *Caenorhabditis* species *elegans*, *brenneri*, *briggsae*, and *japonica*. Identical residues are highlighted in black. Only 5 of these 120 positions are conserved in all four species (4%), whereas Figure 1D shows that in the 19 base pair LZA elements 42 of the 57 positions are conserved in all four species (74%).

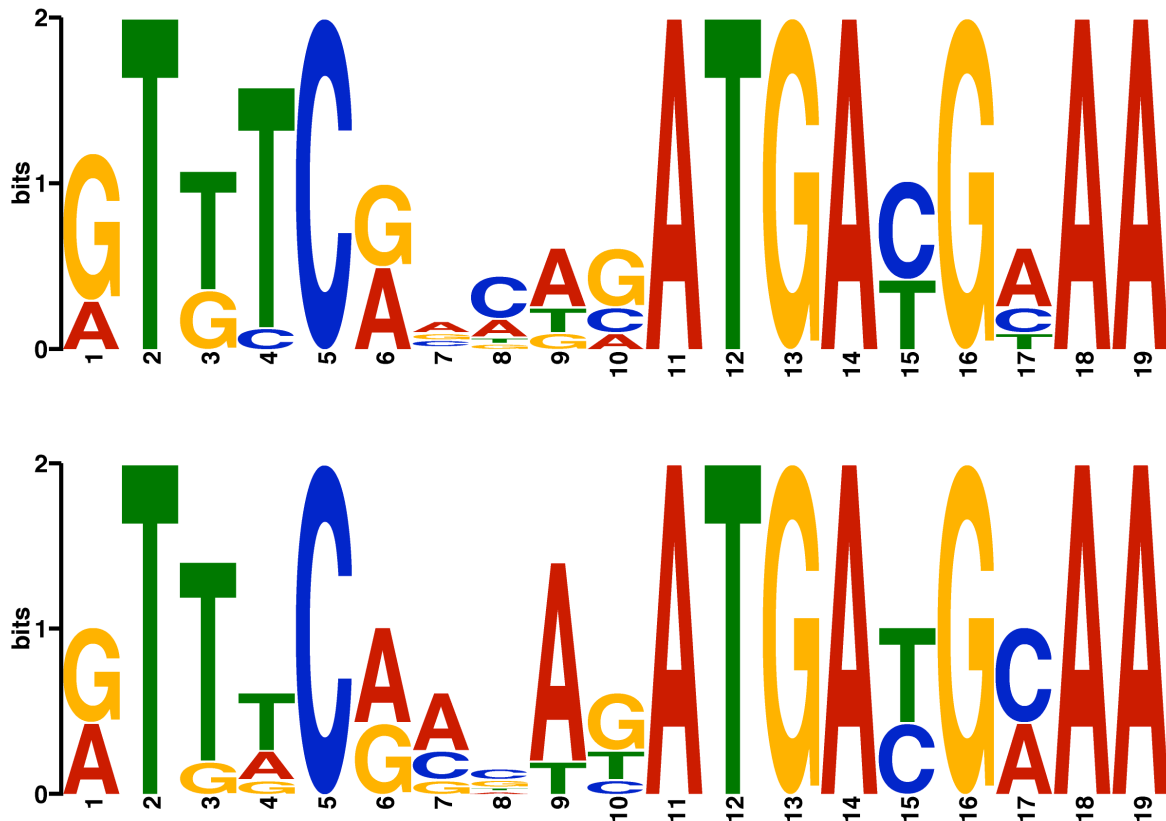

**Supplemental Figure 3.** The LZA weight matrix computed using different sequences. (Top) MEME was used to compute a weight matrix using the 12 LZA elements shown in Figure 1D (this matrix is identical to Figure 1E). Three of these genes were experimentally demonstrated to be induced by zinc deficiency (*C. elegans zipt-2.1*, *zipt-2.3*, and *zipt-7.1*), whereas nine of these genes were not analyzed experimentally but were only analyzed using bioinformatics. (Bottom) MEME was used to compute a weight matrix using the seven LZA elements shown in Figure 4B. All seven of these genes were experimentally demonstrated to be induced by zinc deficiency. The two weight matrices are highly similar but not identical. The height of each nucleotide represents the frequency scaled in bits.

| Rank | Gene            | Strand | Start | End | p-value  | q-value | Matched Sequence     |
|------|-----------------|--------|-------|-----|----------|---------|----------------------|
| 1    | <i>zipt-7.1</i> | +      | 233   | 252 | 2.23E-10 | 0.0153  | GTTTCGCCAGATGATGCAAT |
| 2    | <i>6R55.2</i>   | -      | 555   | 574 | 1.42E-09 | 0.0296  | ATGTCGACAGATGACGCAAT |
| 3    | <i>H11L12.1</i> | +      | 625   | 644 | 1.42E-09 | 0.0296  | ATGTCGACAGATGACGCAAT |
| 4    | <i>T16G12.1</i> | -      | 558   | 577 | 2.16E-09 | 0.0296  | ATGTCGACAGATGATGCAAT |

|    |                  |   |      |      |          |        |                      |
|----|------------------|---|------|------|----------|--------|----------------------|
| 5  | <i>T16G12.3</i>  | + | 1747 | 1766 | 2.16E-09 | 0.0296 | ATGTCGACAGATGATGCAAT |
| 6  | <i>D2024.10</i>  | - | 2882 | 2901 | 3.28E-09 | 0.0375 | ATTTACAAGATGATGAAAC  |
| 7  | <i>F45E4.6</i>   | - | 187  | 206  | 1.05E-08 | 0.0905 | GTTTCGTCAGATGATGCAAA |
| 8  | <i>plp-1</i>     | + | 1058 | 1077 | 1.05E-08 | 0.0905 | GTTTCGTCAGATGATGCAAA |
| 9  | <i>zipt-2.3</i>  | + | 2167 | 2186 | 1.97E-08 | 0.137  | ATGTCAATTCATGACGAAAC |
| 10 | <i>srw-7</i>     | - | 182  | 201  | 2.20E-08 | 0.137  | GTTACAACATATGACGCAAT |
| 11 | <i>R08F11.4</i>  | + | 556  | 575  | 2.20E-08 | 0.137  | GTTACAACATATGACGCAAT |
| 12 | <i>Y54G2A.21</i> | + | 1506 | 1525 | 2.76E-08 | 0.143  | GTGTCGTCATATGATGCAAT |
| 13 | <i>EGAP1.1</i>   | + | 168  | 187  | 3.13E-08 | 0.143  | GTTACAGAAAATGATGAAAC |
| 14 | <i>ubq-1</i>     | - | 1944 | 1963 | 3.13E-08 | 0.143  | GTTACAGAAAATGATGAAAC |
| 15 | <i>C33B4.4</i>   | + | 2261 | 2280 | 3.58E-08 | 0.154  | ATGTCGGGTAATGACGAAAC |
| 16 | <i>C06G3.3</i>   | - | 2378 | 2397 | 5.36E-08 | 0.193  | GTTTCGACTGATGATGAATT |
| 17 | <i>srm-2</i>     | - | 757  | 776  | 5.65E-08 | 0.193  | ATTTCAGAAGATGACACAAT |
| 18 | <i>rme-1</i>     | - | 1130 | 1149 | 5.88E-08 | 0.193  | ATTCCAGAACATGATGAAAT |
| 19 | <i>mdt-22</i>    | + | 1456 | 1475 | 6.13E-08 | 0.193  | ATTACGGTAGATGATGTAAC |
| 20 | <i>Y59C2A.1</i>  | - | 2631 | 2650 | 6.18E-08 | 0.193  | ATTTCAAAAAATGATAAAAC |
| 21 | <i>egl-4</i>     | - | 1971 | 1990 | 8.68E-08 | 0.243  | ATGTCAGAAAATGACGAAAA |
| 22 | <i>F54C9.11</i>  | - | 287  | 306  | 8.91E-08 | 0.243  | ATTTCAAGTGATGATATAAT |
| 23 | <i>dkf-2</i>     | - | 566  | 585  | 9.20E-08 | 0.243  | ATTTCGGAAAATGATGCAAA |
| 24 | <i>gyg-1</i>     | + | 788  | 807  | 9.20E-08 | 0.243  | ATTTCGGAAAATGATGCAAA |
| 25 | <i>ins-5</i>     | + | 922  | 941  | 1.04E-07 | 0.25   | GTTTCAACTATTGATAAAAT |
| 26 | <i>F44E7.5</i>   | - | 439  | 458  | 1.16E-07 | 0.25   | GTTGCGAGAGATGATGCAAT |
| 27 | <i>T22F3.10</i>  | - | 1936 | 1955 | 1.47E-07 | 0.25   | ATTTCAACAATTGATAAAAC |
| 28 | <i>spe-39</i>    | + | 82   | 101  | 1.48E-07 | 0.25   | ATTCCAAATGATGATAAAAC |
| 29 | <i>spn-4</i>     | - | 488  | 507  | 1.48E-07 | 0.25   | ATTCCAAATGATGATAAAAC |
| 30 | <i>klp-4</i>     | - | 2323 | 2342 | 1.55E-07 | 0.25   | GTTTCAGGAGATGAGGTAAC |
| 31 | <i>F36D1.5</i>   | + | 1806 | 1825 | 1.57E-07 | 0.25   | ATTTCATTTGTTGATGAAAT |
| 32 | <i>F40F8.5</i>   | - | 1972 | 1991 | 1.71E-07 | 0.25   | ATTTCGTGAATGATGTAAT  |
| 33 | <i>sru-42</i>    | - | 673  | 692  | 1.77E-07 | 0.25   | ATTTCAAATAATGACATAAT |
| 34 | <i>H28G03.2</i>  | - | 1115 | 1134 | 1.80E-07 | 0.25   | ATTTCAAAAAATGACAAAAA |
| 35 | <i>hot-1</i>     | - | 742  | 761  | 1.82E-07 | 0.25   | ATGCCGAAAAATGACGAAAA |
| 36 | <i>T07A9.12</i>  | - | 1315 | 1334 | 1.82E-07 | 0.25   | ATGCCGAAAAATGACGAAAA |
| 37 | <i>pqn-98</i>    | - | 1886 | 1905 | 1.84E-07 | 0.25   | ATTACGACAGTTGACAAAAT |

|    |                  |   |      |      |          |       |                       |
|----|------------------|---|------|------|----------|-------|-----------------------|
| 38 | <i>Y73F8A.24</i> | - | 741  | 760  | 1.91E-07 | 0.25  | GTGTCACTTTTTGATGAAAT  |
| 39 | <i>sre-50</i>    | + | 1053 | 1072 | 1.99E-07 | 0.25  | ATTTCAATTATTGACGTAAT  |
| 40 | <i>C50E10.1</i>  | - | 72   | 91   | 1.99E-07 | 0.25  | ATTTCAATTATTGACGTAAT  |
| 41 | <i>nhr-249</i>   | + | 1265 | 1284 | 2.03E-07 | 0.25  | GTTTCGTCAATTGATGTAAA  |
| 42 | <i>kin-33</i>    | - | 107  | 126  | 2.04E-07 | 0.25  | ATGACGAAAAATGACGAAAA  |
| 43 | <i>sdz-21</i>    | + | 1798 | 1817 | 2.14E-07 | 0.254 | GTGTCAAGTGATGATGAATC  |
| 44 | <i>M05D6.6</i>   | + | 45   | 64   | 2.18E-07 | 0.254 | ATTTCAATTATATGACGAAAA |
| 45 | <i>gbh-2</i>     | - | 2610 | 2629 | 2.18E-07 | 0.254 | ATTTCAATTATATGACGAAAA |
| 46 | <i>trp-4</i>     | - | 355  | 374  | 2.22E-07 | 0.254 | GTTTCGTTTGTGACAAAAT   |
| 47 | <i>B0365.1</i>   | + | 605  | 624  | 2.51E-07 | 0.281 | GTGTCAAAGGATGACCAAAT  |
| 48 | <i>lin-14</i>    | - | 2886 | 2905 | 2.55E-07 | 0.281 | GTGTCAAAAAGATGAAGAAAA |
| 49 | <i>fbxa-21</i>   | + | 2620 | 2639 | 2.58E-07 | 0.281 | ATGTCAAAAATTGACGAAAA  |
| 50 | <i>srv-11</i>    | + | 1144 | 1163 | 2.68E-07 | 0.283 | GTTTGAAAATATGACGAAAC  |

**Supplemental Table 1.** Genes identified by searching for LZA elements in *C. elegans* promoters. The Rank column is the ranking of each gene based on similarity to the LZA weight matrix. The Gene column is the Wormbase ID or gene name. *zipt-7.1* and *zipt-2.3* are shown in red. The strand column indicates orientation of the LZA element relative to the transcribed strand. The Start and End columns define the location of the LZA element in base pairs from the ATG start codon. The p-value is defined as the probability of a random sequence of the same length as the motif matching that position of the sequence with as good or better a score. The q-value is defined as the false discovery rate if the occurrence is accepted as significant. The Matched Sequence is the LZA element nucleotide sequence. The list is sorted by p-value [32].

| Primer                  | Sequence                 |
|-------------------------|--------------------------|
| <i>ama-1</i> Forward    | ATCGGAGCAGCCAGGAACTT     |
| <i>ama-1</i> Reverse    | GACTGTATGATGGTGAAGCTGG   |
| <i>mCherry</i> Forward  | CCGCAAACTAAAGGTAAGTAAAG  |
| <i>mCherry</i> Reverse  | TCTGGTATATCTGCCGGATG     |
| <i>zipt-1</i> Forward   | TCTCTGTTTCATGCTCTGTTCCG  |
| <i>zipt-1</i> Reverse   | GAAGTAGACGAACTCCAAGGC    |
| <i>zipt-2.1</i> Forward | GATCAAAATGACAGCGGATGG    |
| <i>zipt-2.1</i> Reverse | ATGGGTAACCGGAATTCTACG    |
| <i>zipt-2.2</i> Forward | GTTGGCTTGCAGATTTCTATGG   |
| <i>zipt-2.2</i> Reverse | CCATGAGACTGTAGATGAGGATG  |
| <i>zipt-2.3</i> Forward | ATATGAATCAGACGCCGAAGG    |
| <i>zipt-2.3</i> Reverse | TGAAGGATGTTGGAGTGGTGG    |
| <i>zipt-2.4</i> Forward | TCATGAAACTACACCTCCATTGG  |
| <i>zipt-2.4</i> Reverse | TGTTTTCGTCAGTGCAGTCCG    |
| <i>zipt-3</i> Forward   | ATTCAGATGACAGCGGAGAAG    |
| <i>zipt-3</i> Reverse   | ATTACAAATATTCCGATTCCAGCG |
| <i>zipt-7.1</i> Forward | AGCTGGAAATACTCTTGGATGG   |
| <i>zipt-7.1</i> Reverse | CAGTAACGGCTTGCAAACG      |
| <i>zipt-7.2</i> Forward | CATGAGGATCACGGACACAG     |
| <i>zipt-7.2</i> Reverse | GCAGAGATGAGAAGTGTAGCC    |
| <i>zipt-9</i> Forward   | TTAGTCAGTATATTCCGGCGCTG  |

|                         |                         |
|-------------------------|-------------------------|
| <i>zipt-9</i> Reverse   | GTCGTGATGGTTGTCTTGATG   |
| <i>zipt-11</i> Forward  | TCTTGATGTTGCAGCTCTGG    |
| <i>zipt-11</i> Reverse  | CAAAGAATCCGCCTCCATG     |
| <i>zipt-13</i> Forward  | GCGTGTGCCTATTTGAACTTG   |
| <i>zipt-13</i> Reverse  | TCGTGAGGAATTTCTGGAG     |
| <i>zipt-20</i> Forward  | GTCGGAATTGGAGAACTCGG    |
| <i>zipt-20</i> Reverse  | AAGTGAGACGTTTAGGGCTTC   |
| <i>zipt-21</i> Forward  | ACTACACAGAAGCCGTCAAC    |
| <i>zipt-21</i> Reverse  | ACTACATCCCGAGACAATTGC   |
| <i>zipt-22</i> Forward  | TTGTATGTTGCCTGGGTGG     |
| <i>zipt-22</i> Reverse  | TGCTCAAACCATCCTAATCCG   |
| <i>GFP</i> Forward      | GGAACTACAAGACACGTGCTG   |
| <i>GFP</i> Reverse      | GTTGTATTCCAATTTGTGTCC   |
| <i>F44E7.5</i> Forward  | GTCCAAAGCAAGAAGTCAAGTG  |
| <i>F44E7.5</i> Reverse  | TGAGCCGTTTGTAGAGTTTAGAG |
| <i>R08F11.4</i> Forward | AGTCATCCTGTTTGGGTCTTG   |
| <i>R08F11.4</i> Reverse | GCTAGATCCATCAACGTCCG    |
| <i>srw-7</i> Forward    | GCTGCATTTTCATTAGTGGTCAG |
| <i>srw-7</i> Reverse    | AGCCATCACTACAACCAATTTTG |
| <i>D2024.10</i> Forward | GAGGGACCTTTGGAAACAAGA   |
| <i>D2024.10</i> Reverse | AATTGTTCCGTTGTGCAGC     |
| <i>HSPCB</i> Forward    | TCTGGGTATCGGAAAGCAAGCC  |
| <i>HSPCB</i> Reverse    | GTGCACTTCCTCAGGCATCTTG  |
| <i>hZIP2</i> Forward    | TCATGGTGCAGAACAGATCAG   |
| <i>hZIP2</i> Reverse    | AATGCCAGCGACTCCAAA      |
| <i>hZIP13</i> Forward   | TCATGGTGCAGAACAGATCAG   |
| <i>hZIP13</i> Reverse   | AATGCCAGCGACTCCAAA      |

**Supplemental Table 2.** Primers used for qRT-PCR reactions described in the Materials and Methods. Each primer is listed in the 5' to 3' direction.

## SUPPLEMENTAL METHODS

### Phylogenetic analysis

To analyze evolutionary conservation, we used *C. elegans* ZIPT proteins to search ORFs of *S. cerevisiae*, *A. thaliana* and humans using PSI-BLAST. The orthologs identified by this search were analyzed by reciprocal PSI-BLAST; each was used to search *C. elegans* ORFs to determine the most similar proteins. Multiple sequence alignment of ZIPT proteins was carried out using ClustalW, and the resulting alignment was used to generate a phylogenetic tree using MEGA (1).

1. Tamura, K., Dudley, J., Nei, M. and Kumar, S. (2007) MEGA4: Molecular Evolutionary Genetics Analysis (MEGA) Software Version 4.0. *Mol. Biol. Evol.*, **24**, 1596–1599.
